# Supplementary material
Source: ML conference proceedings conference paper supplement (https://openreview.net/forum?id=SvmJJJS0q1)

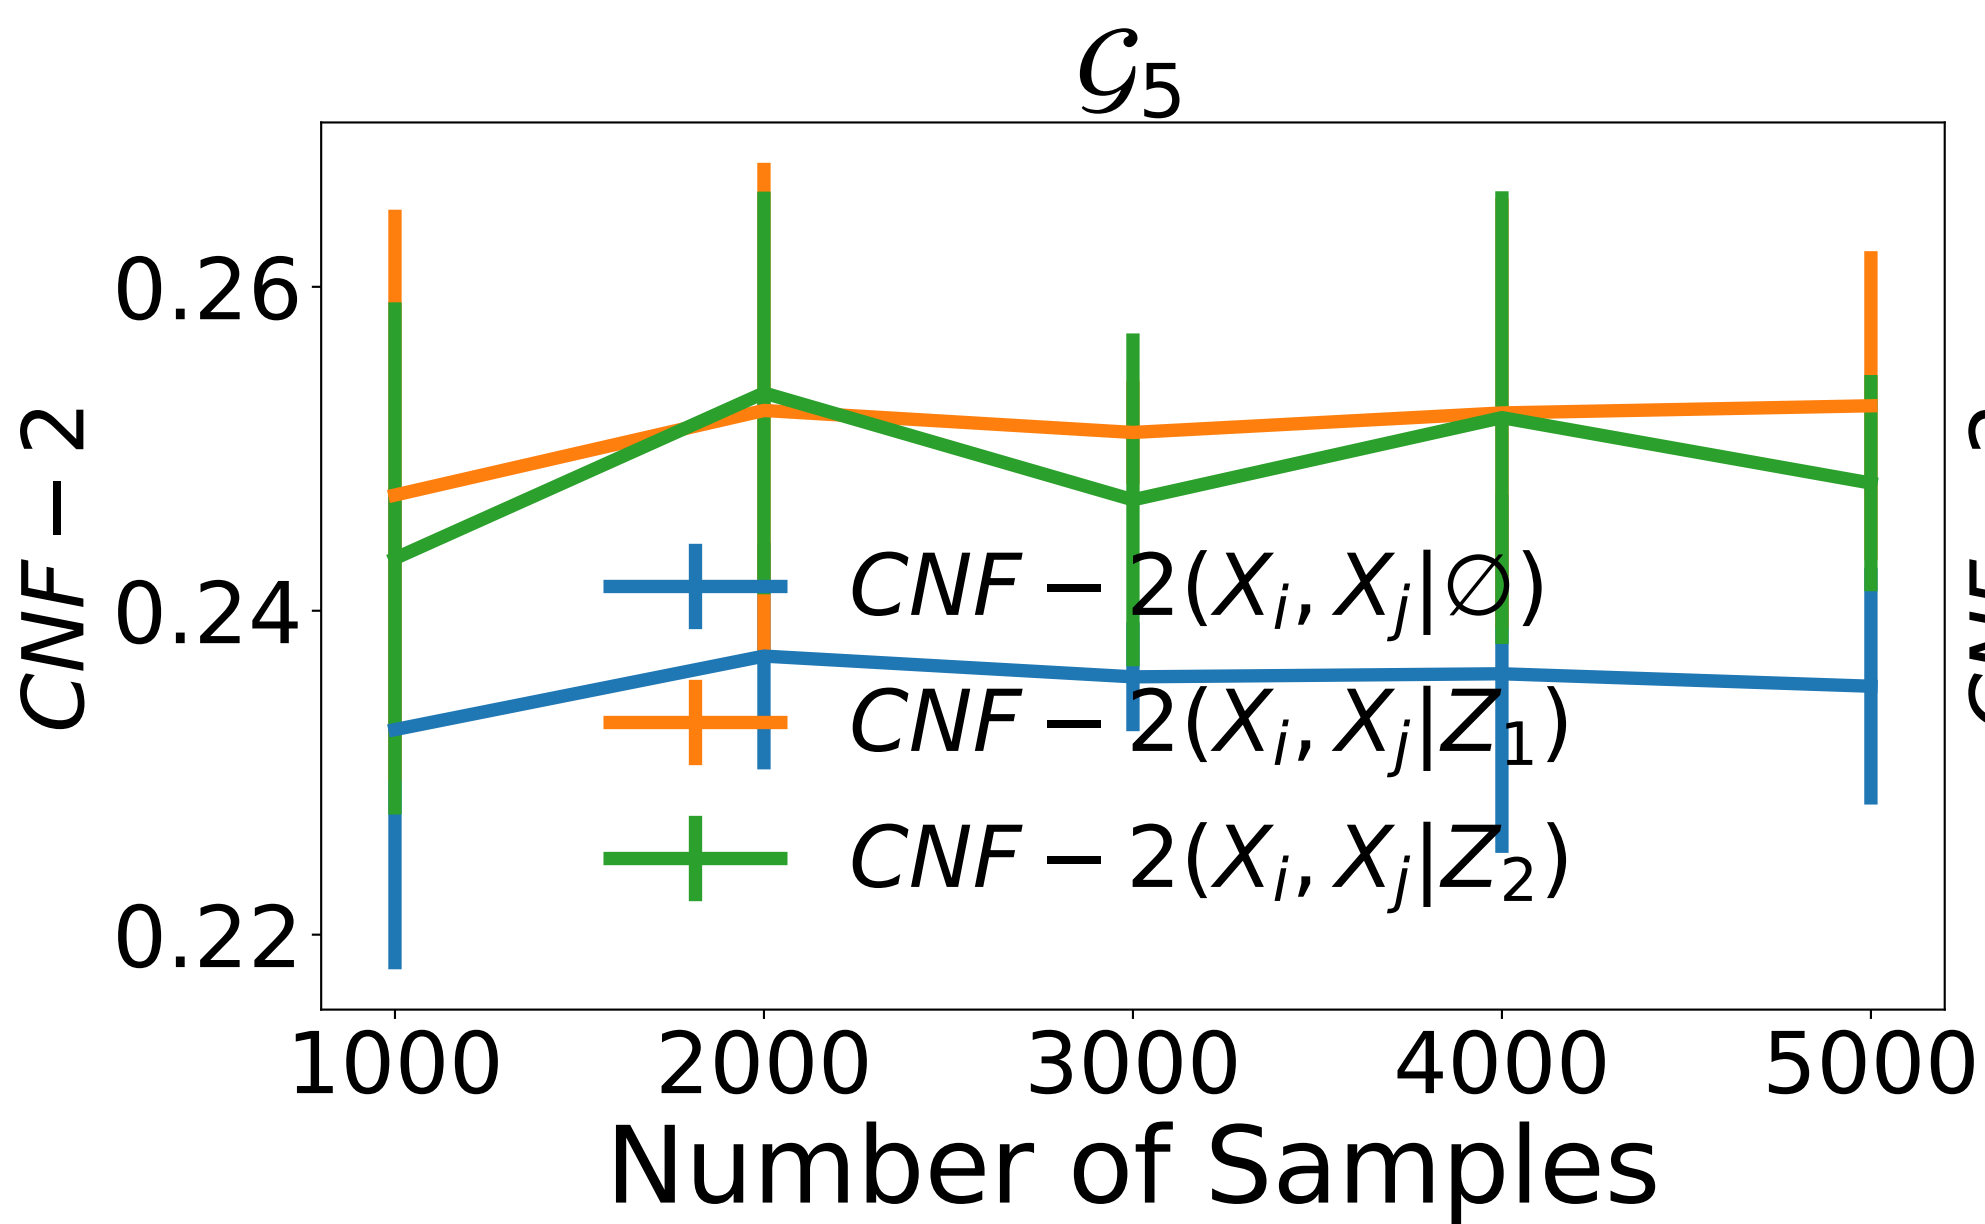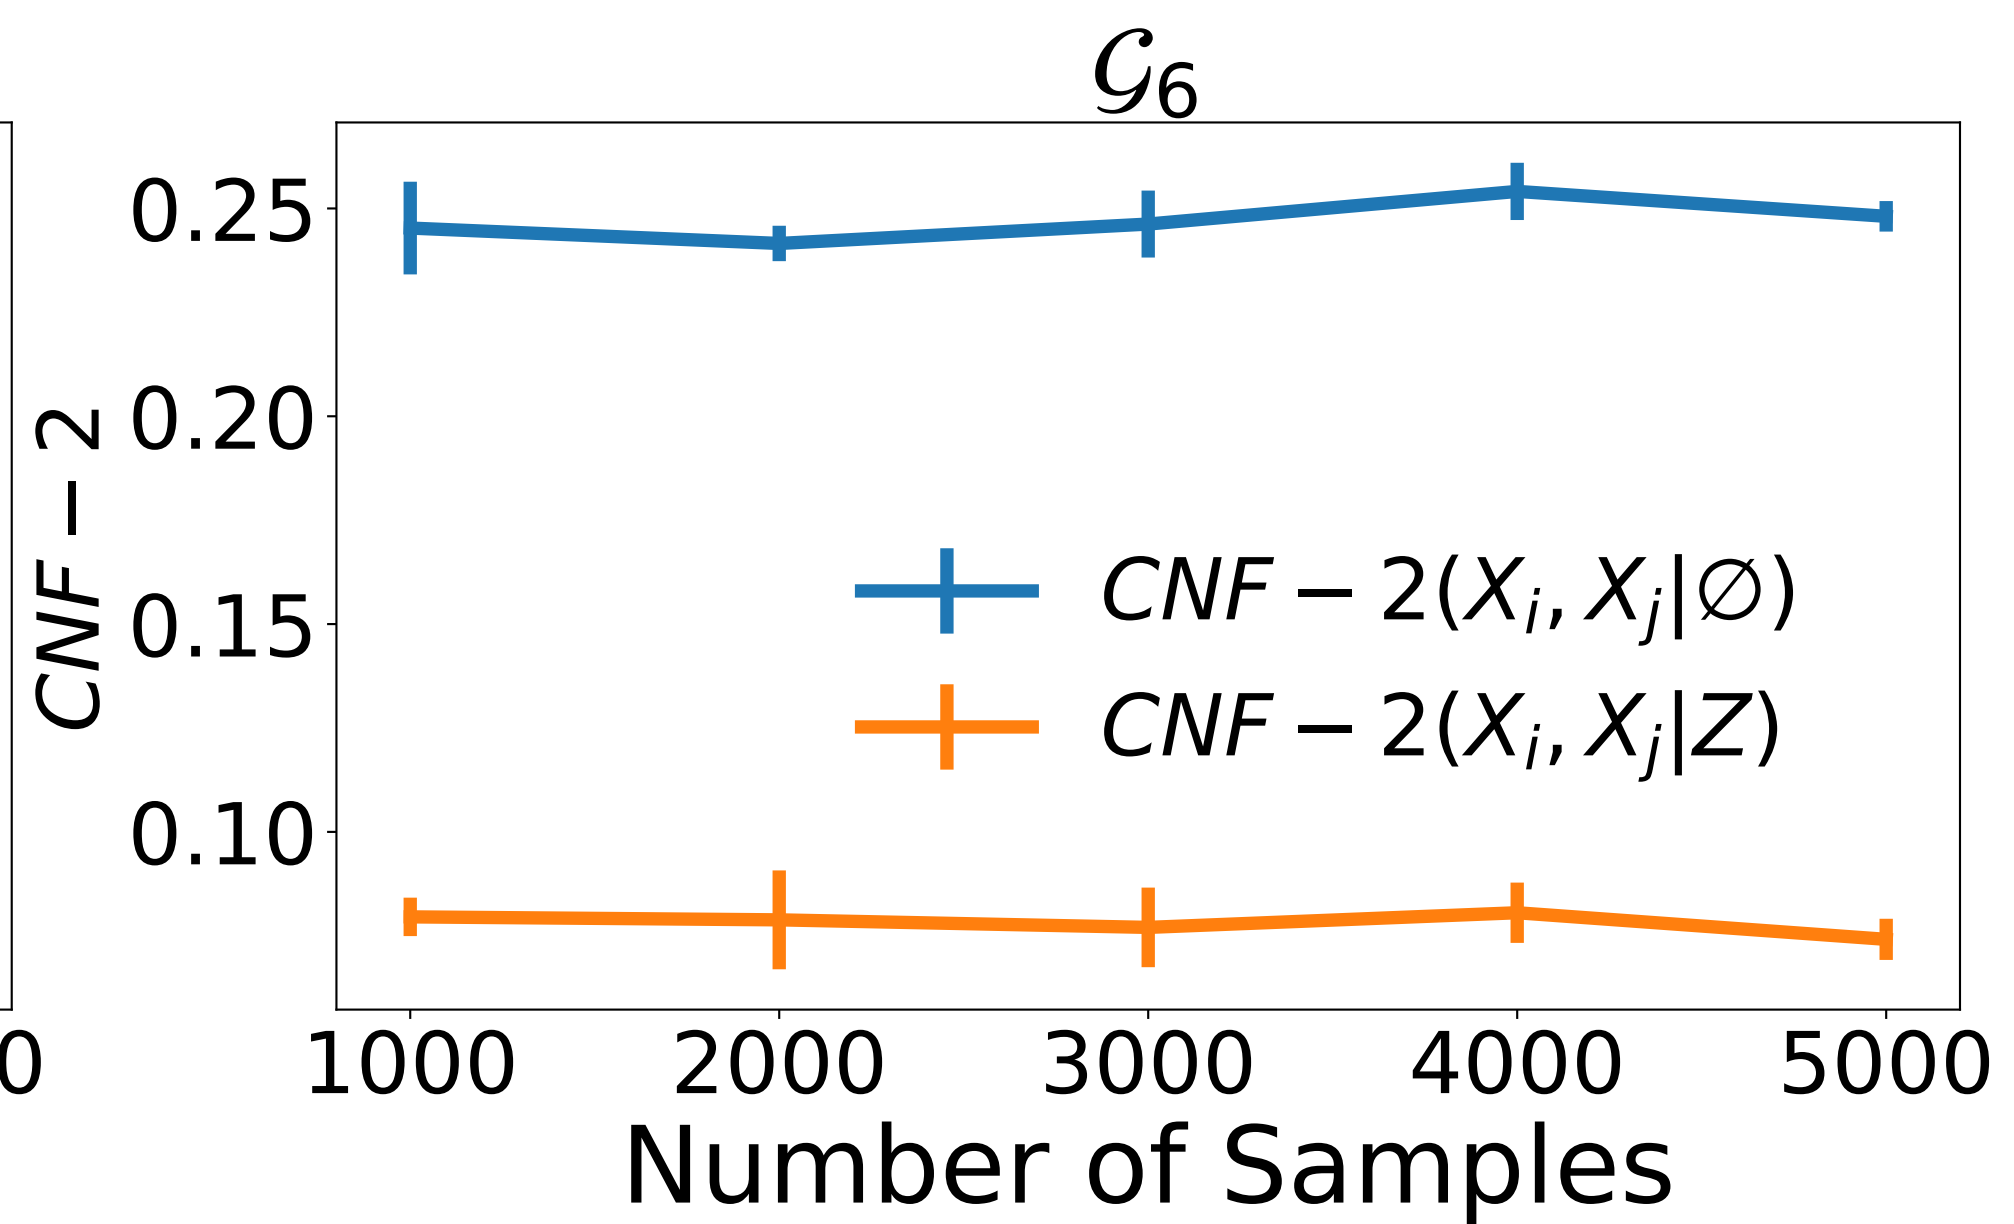

Supplement: supplementary_material [file attachment]

Setting 1

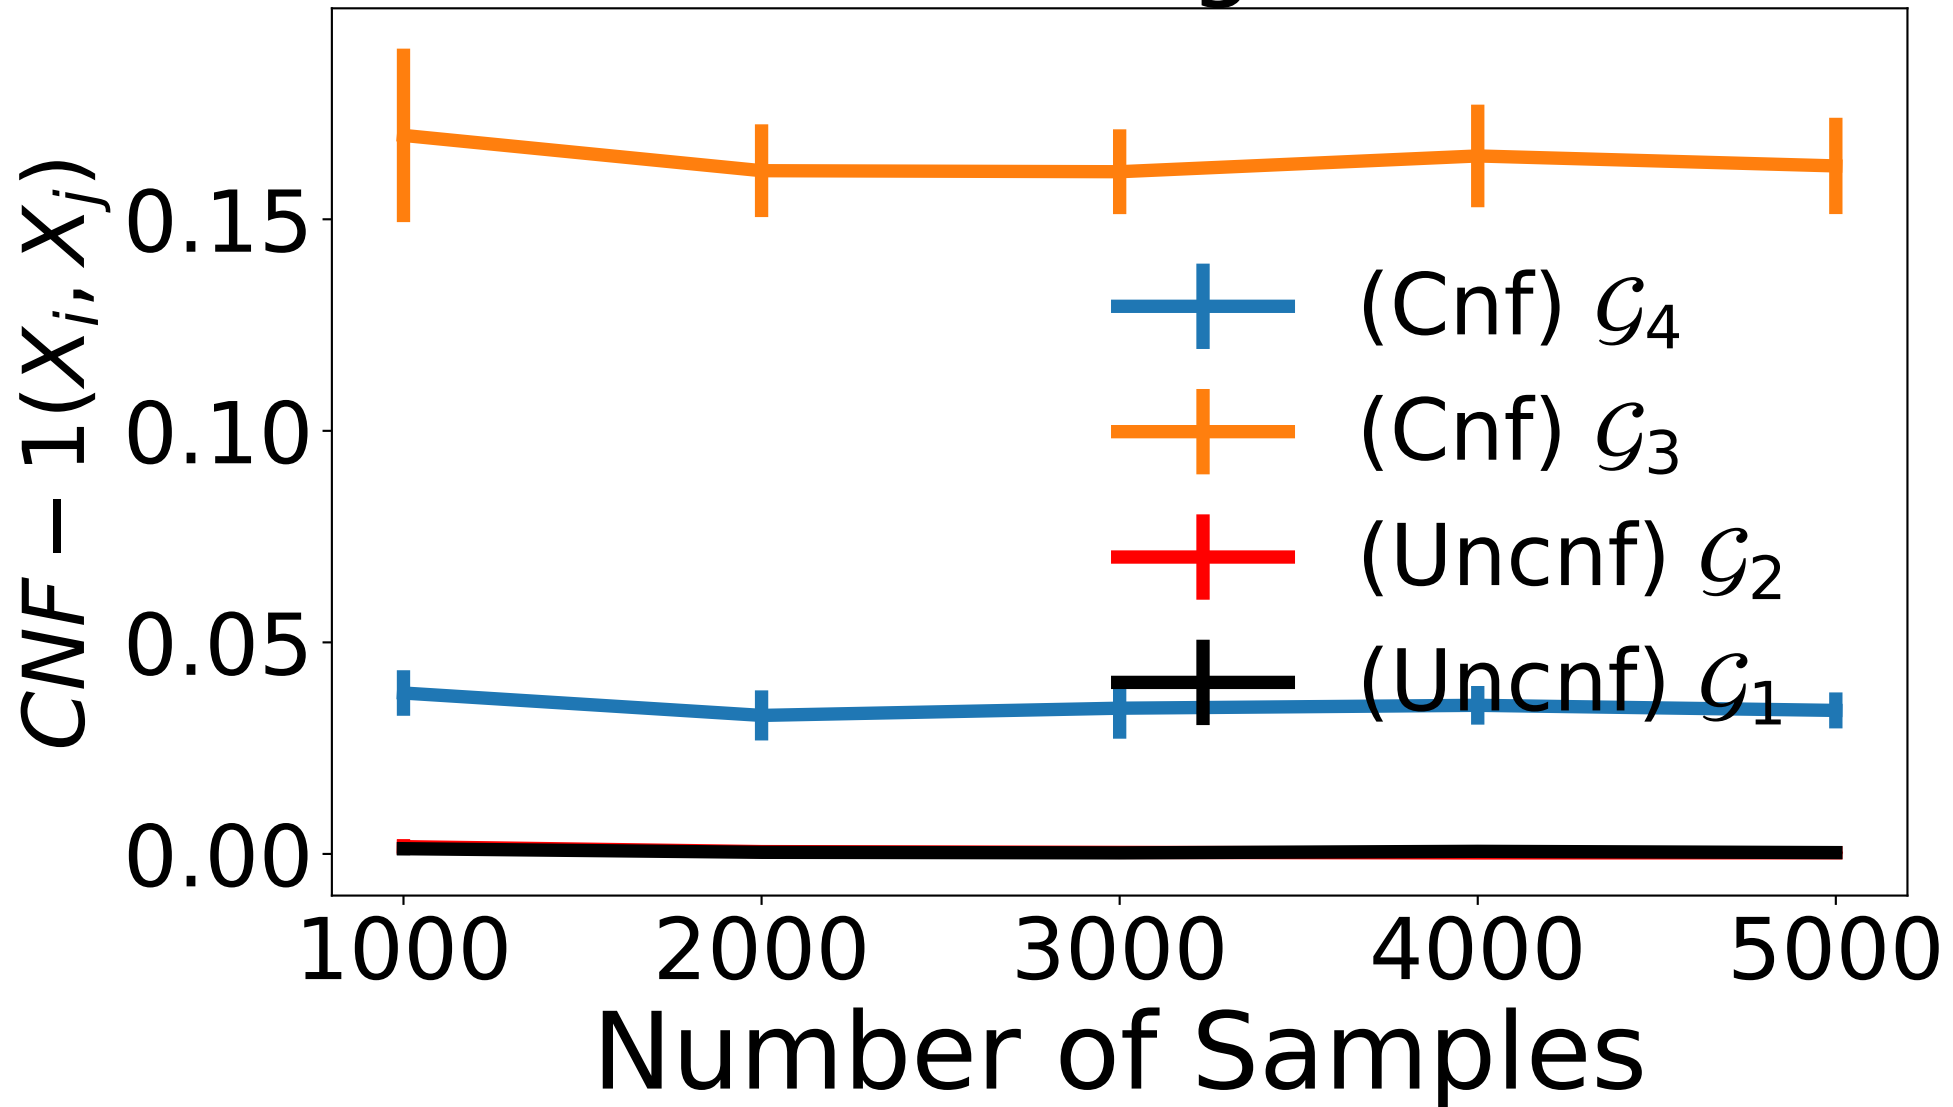

Setting 2

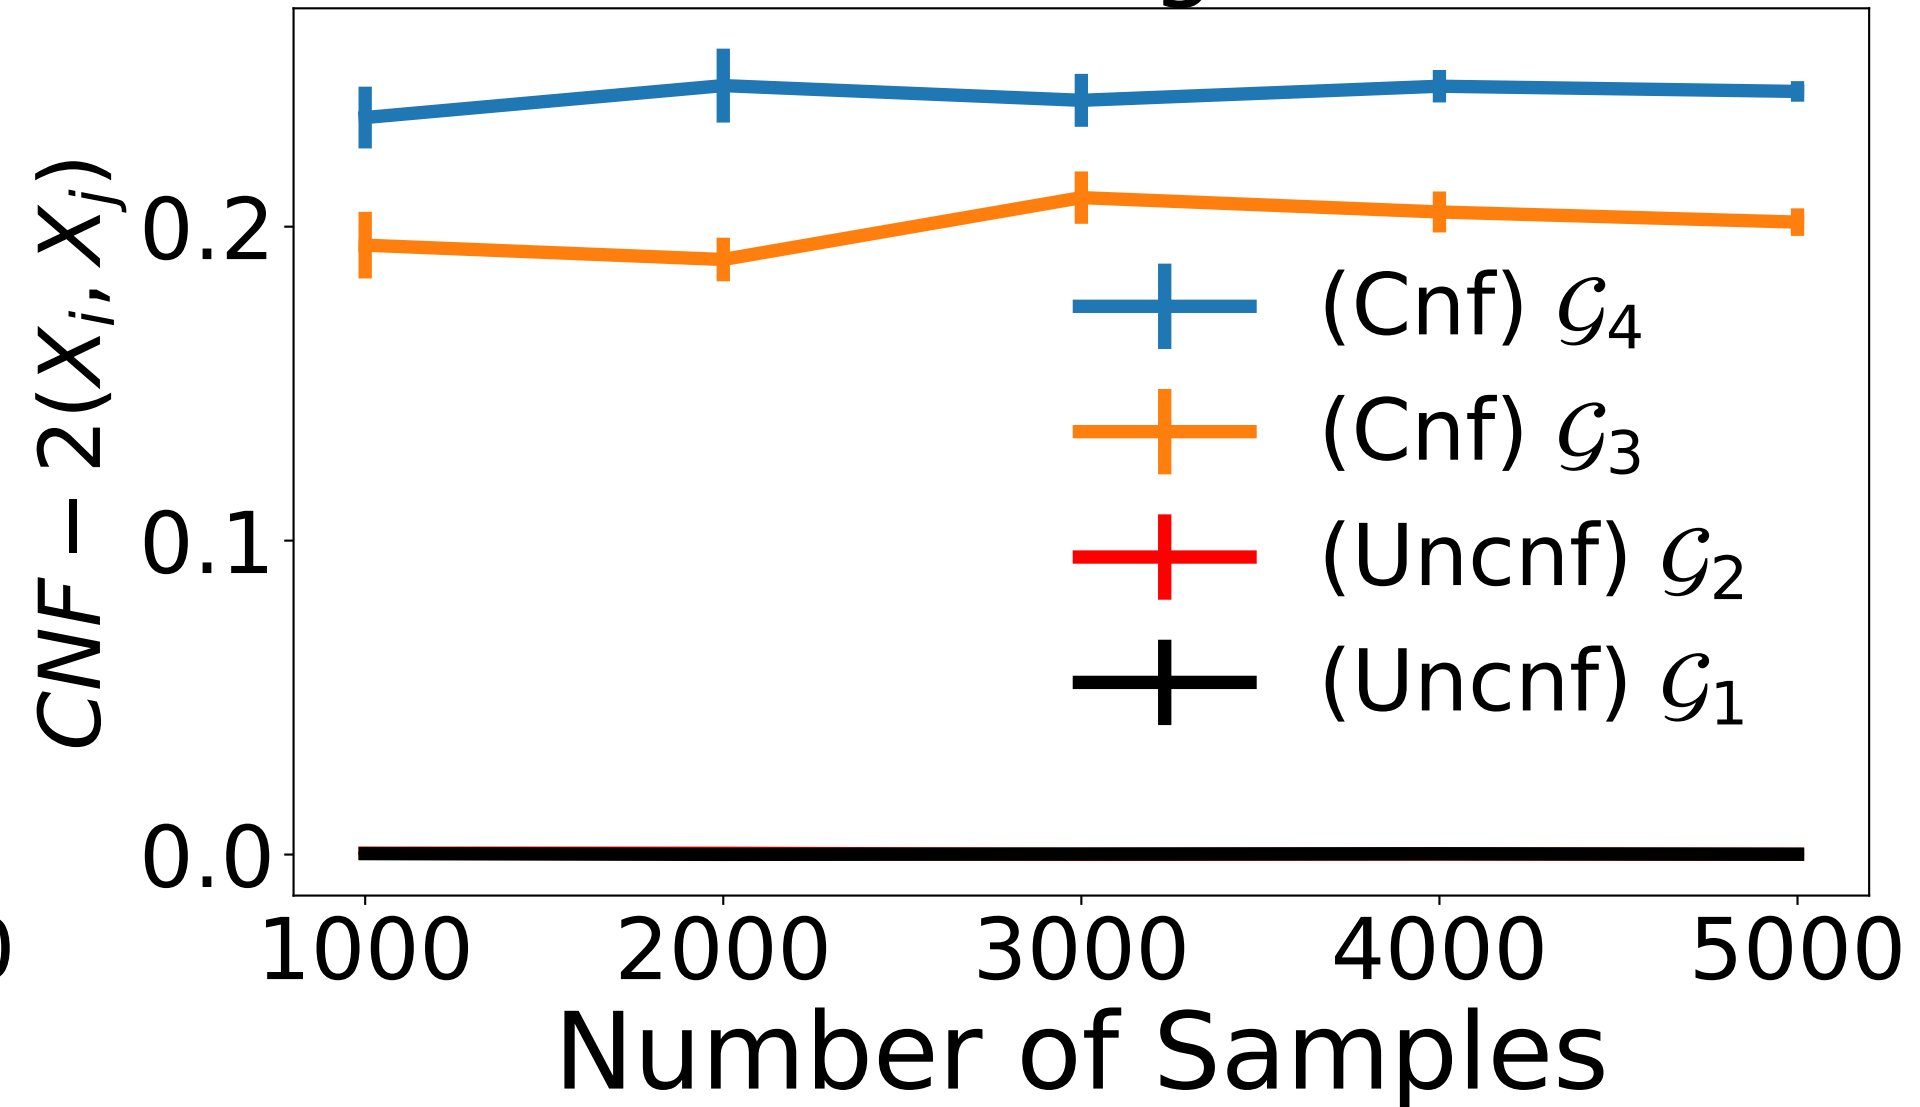

Setting 3

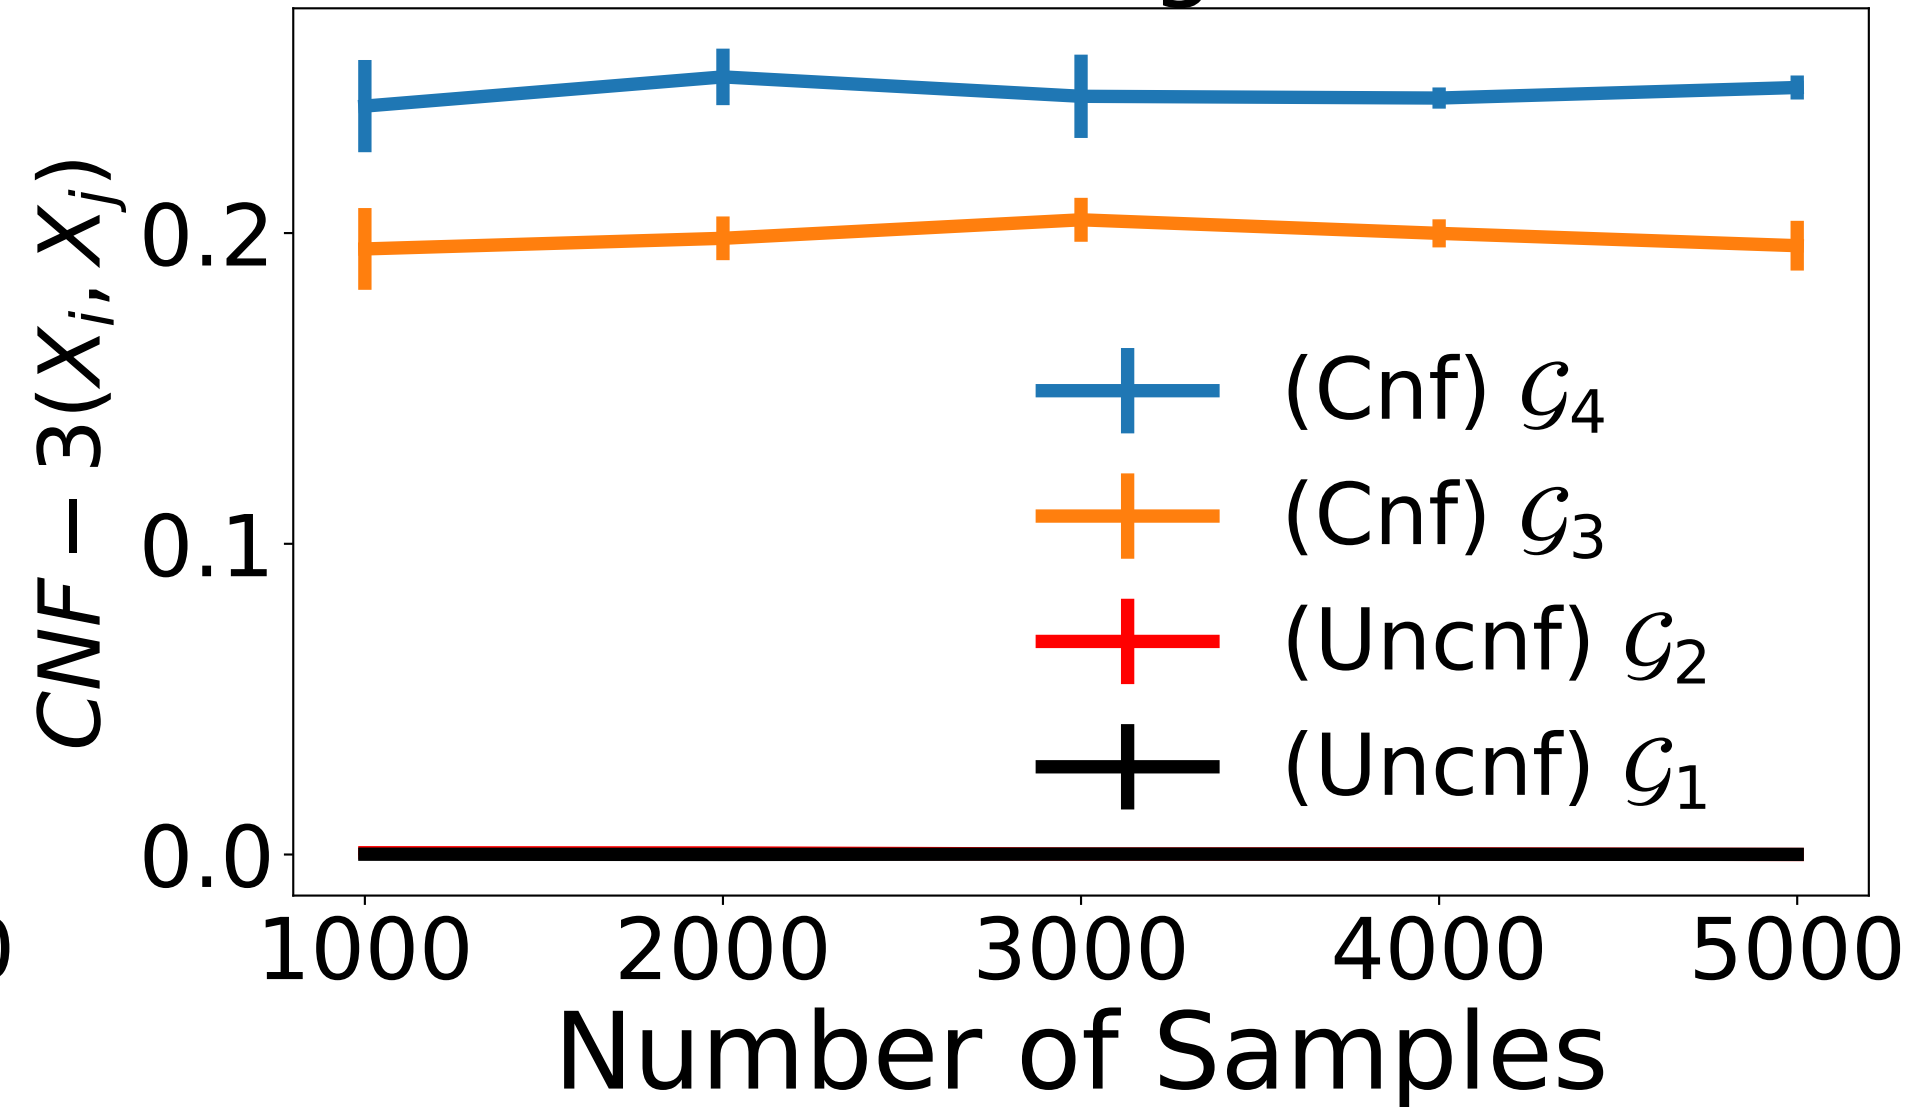

Supplement: supplementary_material [file attachment]
